# Supplementary material for: Forest Succession and Maternity Day Roost Selection byMyotis septentrionalisin a Mesophytic Hardwood Forest
Source: Hindawi journal article supplement (doi:10.1155/2012/148106), 2012-01-01
Supplement: f1 [file 148106.f1.docx]

**Appendix A.** Date of capture, sex, age class, weight, forearm length, reproductive condition, and number or re-locations for each northern bat (*Myotis septentrionalis*) bat captured between 24 May and 17 July 2011 on the Fort Knox military reservation in Hardin, Bullitt and Meade counties, Kentucky, USA.

| Date | Sex | Age class | Weight (g) | Forearm length (mm) | Reproductive condition | Number of Re-locations |
| --- | --- | --- | --- | --- | --- | --- |
| 24-May-11 | ♂ | adult | 5.5 | 36 | non-reproductive | 0 |
| 24-May-11 | ♂ | adult | 5 | 34 | non-reproductive | 0 |
| 24-May-11 | ♀ | adult | 7.5 | 35 | non-reproductive | 0 |
| 24-May-11 | ♀ | adult | 6 | 35 | non-reproductive | 8 |
| 24-May-11 | ♂ | adult | 5.5 | 34 | non-reproductive | 2 |
| 24-May-11 | ♂ | adult | 5 | 34 | non-reproductive | 0 |
| 24-May-11 | ♀ | adult | 7 | 37 | pregnant | 0 |
| 24-May-11 | ♂ | adult | 5.5 | 36 | non-reproductive | 0 |
| 24-May-11 | ♂ | adult | 6.5 | 34 | non-reproductive | 0 |
| 24-May-11 | ♀ | adult | 5.5 | 36 | lactating | 7 |
| 24-May-11 | ♀ | adult | 9.5 | 35 | pregnant | 6 |
| 24-May-11 | ♀ | adult | 8 | 34 | pregnant | 6 |
| 25-May-11 | ♀ | adult | 9.5 | 37 | pregnant | 1 |
| 25-May-11 | ♀ | adult | 9 | 38 | pregnant | 4 |
| 25-May-11 | ♂ | adult | 7.5 | 33 | non-reproductive | 0 |
| 27-May-11 | ♀ | adult | 10 | 36 | pregnant | 1 |
| 27-May-11 | ♀ | adult | 7.5 | 34 | non-reproductive | 2 |
| 28-May-11 | ♀ | adult | 8 | 36 | pregnant | 1 |
| 28-May-11 | ♂ | adult | 7.5 | 34 | non-reproductive | 0 |
| 28-May-11 | ♀ | adult | 10 | 37 | pregnant | 4 |
| 28-May-11 | ♂ | adult | 6 | 35 | non-reproductive | 0 |
| 28-May-11 | ♂ | adult | 10.5 | 35 | non-reproductive | 0 |
| 28-May-11 | ♂ | adult | 5.5 | 32 | non-reproductive | 4 |
| 28-May-11 | ♂ | adult | 6.5 | 34 | non-reproductive | 0 |
| 29-May-11 | ♀ | adult | 7 | 36 | non-reproductive | 3 |
| 1-Jun-11 | ♀ | adult | 6.5 | 35 | non-reproductive | 1 |
| 1-Jun-11 | ♂ | adult | 4.5 | 34 | non-reproductive | 0 |
| 1-Jun-11 | ♂ | adult | 6.5 | 36 | non-reproductive | 0 |
| 1-Jun-11 | ♀ | adult | 9.5 | 37 | pregnant | 1 |
| 1-Jun-11 | ♂ | adult | 6.5 | 34 | non-reproductive | 0 |
| 4-Jun-11 | ♀ | adult | 8 | 35 | pregnant | 4 |
| 4-Jun-11 | ♀ | adult | 8.5 | 38 | pregnant | 3 |
| 6-Jun-11 | ♀ | adult | 8 | 36 | non-reproductive | 3 |
| 9-Jun-11 | ♀ | adult | 7 | 35 | lactating | 6 |
| 9-Jun-11 | ♀ | adult | 7.5 | 37 | non-reproductive | 0 |
| 10-Jun-11 | ♀ | adult | 6 | 34 | lactating | 7 |
| 10-Jun-11 | ♀ | adult | 6.5 | 35 | pregnant | 4 |
| 10-Jun-11 | ♀ | adult | 8.5 | 34 | pregnant | 4 |
| 10-Jun-11 | ♀ | adult | 6 | 35 | lactating | 8 |
| 10-Jun-11 | ♀ | adult | 7.5 | 37 | pregnant | 5 |
| 10-Jun-11 | ♀ | adult | 9 | 36 | pregnant | 5 |
| 10-Jun-11 | ♀ | adult | 9 | 35 | pregnant | 6 |
| 10-Jun-11 | ♀ | adult | 9.5 | 36 | pregnant | 6 |
| 10-Jun-11 | ♀ | adult | 6.5 | 35 | lactating | 6 |
| 10-Jun-11 | ♀ | adult | 6 | 34 | lactating | 6 |
| 10-Jun-11 | ♀ | adult | 9 | 36 | pregnant | 6 |
| 10-Jun-11 | ♀ | adult | 7 | 34 | lactating | 6 |
| 10-Jun-11 | ♀ | adult | 8 | 36 | lactating | 6 |
| 10-Jun-11 | ♀ | adult | 6 | 36 | lactating | 5 |
| 24-Jun-11 | ♀ | adult | 6.5 | 37 | lactating | 4 |
| 24-Jun-11 | ♀ | adult | 6 | 33 | lactating | 4 |
| 24-Jun-11 | ♀ | adult | 7 | 37 | lactating | 6 |
| 24-Jun-11 | ♀ | adult | 7.5 | 36 | lactating | 8 |
| 24-Jun-11 | ♀ | adult | 7 | 35 | lactating | 7 |
| 24-Jun-11 | ♀ | adult | 7 | 36 | lactating | 7 |
| 25-Jun-11 | ♀ | adult | 7 | 36 | lactating | 8 |
| 25-Jun-11 | ♀ | adult | 6 | 35 | lactating | 7 |
| 26-Jun-11 | ♀ | adult | 6.5 | 35 | lactating | 6 |
| 26-Jun-11 | ♀ | adult | 6.5 | 35 | lactating | 6 |
| 26-Jun-11 | ♀ | adult | 7 | 35 | lactating | 4 |
| 26-Jun-11 | ♀ | adult | 7.5 | 36 | lactating | 6 |
| 26-Jun-11 | ♀ | adult | 7 | 35 | lactating | 4 |
| 26-Jun-11 | ♀ | adult | 6 | 35 | lactating | 6 |
| 26-Jun-11 | ♀ | adult | 6.5 | 36 | lactating | 5 |
| 4-Jul-11 | ♀ | juvenile | 5 | 34 | non-reproductive | 0 |
| 4-Jul-11 | ♀ | juvenile | 5.5 | 34 | non-reproductive | 0 |
| 7-Jul-11 | ♀ | adult | 8 | 36 | lactating | 5 |
| 7-Jul-11 | ♀ | adult | 7 | 36 | lactating | 3 |
| 7-Jul-11 | ♀ | adult | 7 | 35 | Post-lactation | 7 |
| 8-Jul-11 | ♀ | adult | 8 | 35 | lactating | 3 |
| 8-Jul-11 | ♀ | adult | 7.5 | 35 | lactating | 7 |
| 8-Jul-11 | ♀ | adult | 8 | 36 | lactating | 4 |
| 11-Jul-11 | ♀ | adult | 7 | 35 | Post-lactation | 4 |
| 17-Jul-11 | ♀ | adult | 7 | 36 | Post-lactation | 4 |
| 17-Jul-11 | ♀ | adult | 6.5 | 34 | non-reproductive | 4 |
| 17-Jul-11 | ♂ | adult | 7 | 35 | non-reproductive | 0 |
